# Supplementary material
Source: PubMed Central journal article supplement (PMC2722335)
Supplement: 0906266106_0906266106SI.pdf [file 0906266106_0906266106SI.pdf]

# Supporting Information

Huang et al. 10.1073/pnas.0906266106

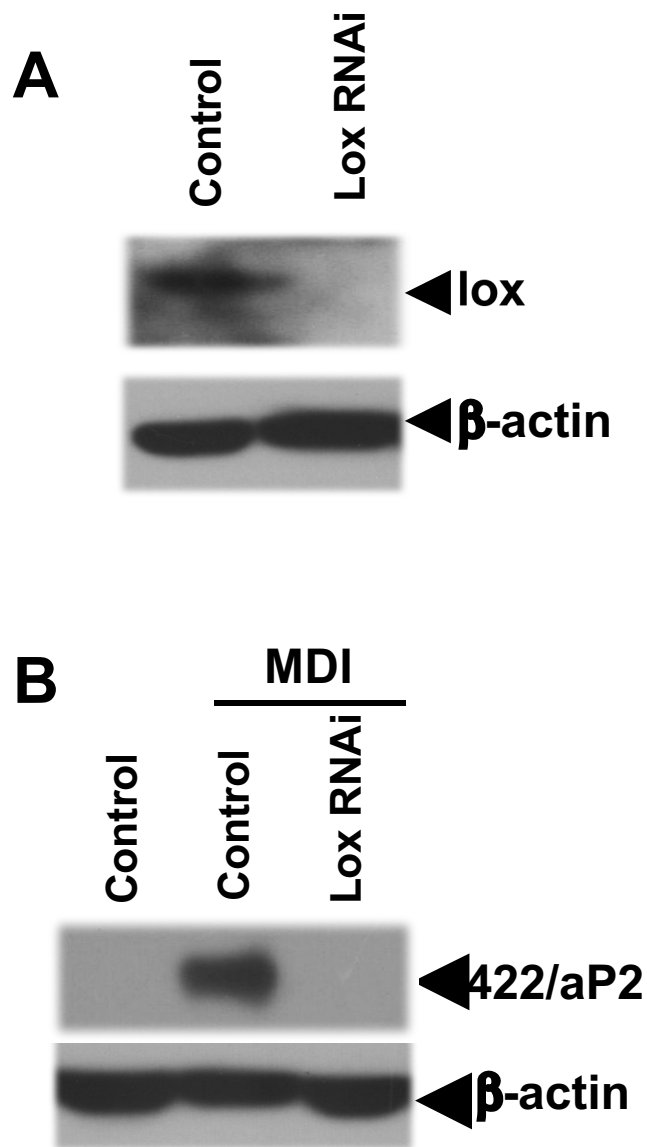

**Fig. S1.** Lysyl oxidase (LOX) is required for MEFs to differentiate into adipocytes. (A) MEFs were plated at 30% confluency and 24 h later transfected with LOX Stealth RNAi, cell extracts were prepared at postconfluence, and the expression of LOX was measured. (B) The effect of LOX knockdown on adipocyte commitment and terminal differentiation assessed by the expression of an adipocyte-specific marker (422/aP2) and by the accumulation of cytoplasmic triglyceride.

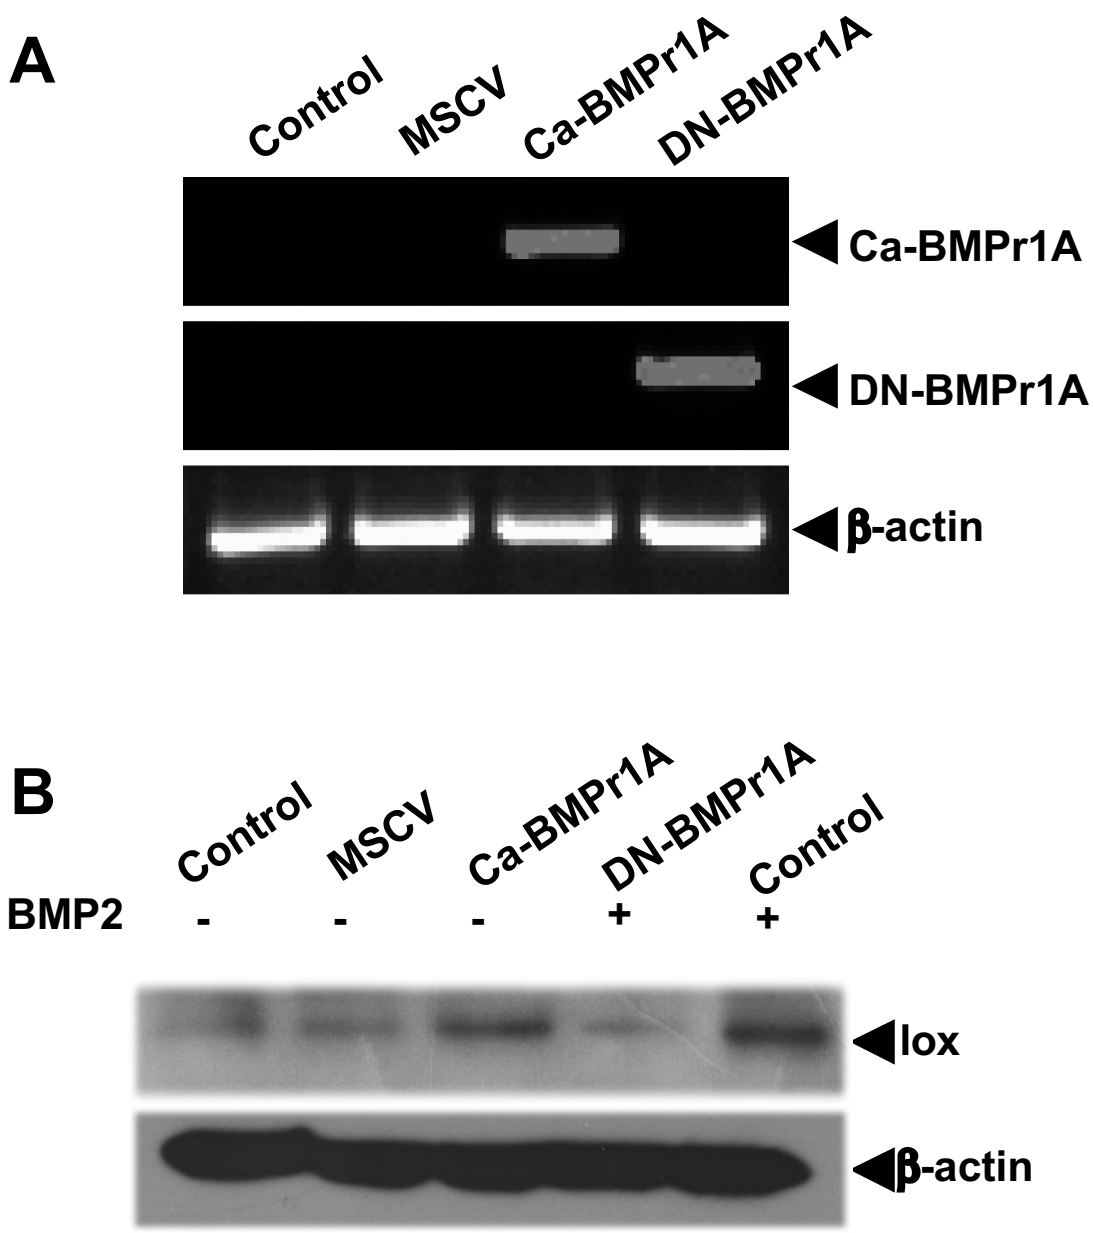

**Fig. S2.** Overexpression of dominant-negative bone morphogenetic protein receptor (DN-BMP<sub>r</sub>1A) prevents the induction of LOX by BMP2. C3H10T1/2 stem cells were infected with retrovirus harboring constitutively active (CA)-BMP<sub>r</sub>1A or DN-BMP<sub>r</sub>1A and treated with/out BMP2. (A) One day after infection, total RNA was isolated and subjected to RT-PCR to confirm the expression of CA-BMP<sub>r</sub>1A or DN-BMP<sub>r</sub>1A; β-actin was used loading control. (B) Whole-cell lysates were prepared, and the effects of overexpressing CA-BMP<sub>r</sub>1A or DN-BMP<sub>r</sub>1A on the induction of LOX by BMP2 were assessed by immunoblotting; β-actin was used loading control.
